# Supplementary material for: Identification and Characterization of SPL Transcription Factor Family Reveals Organization and Chilling-Responsive Patterns in Cabbage (Brassica oleracea var. capitata L.)
Source: MDPI journal article supplement (doi:10.3390/agronomy11071445), 2021-07-20
Supplement: s1 [file s1]

**Table S6.** Known hormone-responsive, light-responsive and stress-responsive *cis*-acting elements in the promoter regions of *BoSPL* genes.

| Elements      | ABRE | ERE      | P-Box       | TCA-<br>Element   | TGA-<br>Element | TGACG-<br>Motif | LTR                | MBS     | STRE               | TC-Rich<br>Repeats    | MRE   | G-Box | GT1-<br>Motif |
|---------------|------|----------|-------------|-------------------|-----------------|-----------------|--------------------|---------|--------------------|-----------------------|-------|-------|---------------|
| Gene<br>names | ABA  | Ethylene | Gibberellin | Salicylic<br>Acid | Auxin           | MeJA            | Low<br>Temperature | Drought | Stress<br>Response | Defense<br>and Stress | Light | Light | Light         |
| BoSPL1        | 1    | 2        | 1           |                   |                 | 1               | 1                  |         |                    | 1                     | 1     | 2     | 4             |
| BoSPL2a       |      | 1        | 2           |                   | 1               | 1               |                    |         | 3                  |                       |       |       | 1             |
| BoSPL2b       | 1    | 1        |             | 1                 | 1               | 1               |                    |         | 1                  | 1                     | 1     | 1     | 1             |
| BoSPL3a       | 5    | 1        |             |                   | 2               |                 |                    | 2       | 2                  |                       | 1     | 3     | 2             |
| BoSPL3b       | 8    | 1        | 1           | 2                 |                 |                 |                    |         | 3                  |                       | 1     | 3     |               |
| BoSPL3c       | 2    | 1        |             | 1                 |                 |                 |                    | 1       | 2                  | 1                     |       | 1     | 2             |
| BoSPL4a       | 2    | 1        |             |                   | 2               | 3               | 1                  |         |                    | 1                     |       | 2     |               |
| BoSPL4b       | 1    | 2        |             | 2                 |                 |                 |                    | 1       | 1                  |                       | 1     |       | 1             |
| BoSPL5a       |      |          |             |                   | 1               |                 | 1                  | 1       | 1                  | 2                     |       |       | 1             |
| BoSPL5b       | 5    | 2        |             | 1                 |                 |                 | 2                  |         | 3                  |                       |       | 2     | 3             |
| BoSPL6a       |      | 2        |             | 1                 |                 | 1               | 1                  |         | 2                  | 1                     | 1     |       | 1             |
| BoSPL6b       | 3    | 4        |             | 1                 |                 | 3               |                    |         | 1                  | 1                     |       | 1     | 2             |
| BoSPL7a       | 2    |          |             |                   |                 |                 | 3                  |         | 3                  | 1                     |       | 1     | 5             |
| BoSPL7b       | 3    |          |             | 1                 | 1               |                 | 5                  |         | 3                  | 1                     |       |       | 6             |
| BoSPL8a       | 8    | 1        | 2           |                   | 2               | 2               | 2                  |         | 5                  |                       |       | 2     | 1             |
| BoSPL8b       | 4    |          | 1           | 1                 |                 | 1               | 2                  |         | 5                  |                       |       | 1     | 4             |
| BoSPL9a       | 4    | 1        |             | 2                 |                 | 1               |                    | 1       | 2                  |                       | 3     | 1     | 1             |
| BoSPL9b       | 3    | 2        |             |                   | 1               | 4               | 1                  |         | 2                  | 1                     | 2     | 3     | 3             |
| BoSPL10a      | 3    | 1        | 1           | 2                 | 1               | 1               |                    |         | 4                  |                       | 1     |       | 1             |
| BoSPL10b      | 1    | 1        |             | 2                 |                 | 1               |                    |         | 3                  |                       |       | 1     |               |
| BoSPL10c      | 2    | 1        |             |                   | 1               | 1               | 1                  |         | 3                  |                       | 1     |       |               |
| BoSPL11a      | 1    | 4        |             |                   |                 |                 |                    |         | 3                  |                       | 2     | 1     | 1             |
| BoSPL11b      |      |          |             | 1                 |                 | 1               | 4                  | 2       | 1                  |                       | 1     |       |               |
| BoSPL13b      |      | 1        |             |                   |                 |                 | 1                  | 4       | 2                  | 1                     |       |       | 2             |
| BoSPL14       | 3    | 4        |             | 1                 |                 | 2               |                    | 1       |                    | 1                     | 1     | 1     | 3             |
| BoSPL15a      | 2    | 4        | 1           |                   |                 | 1               | 6                  |         |                    | 1                     |       | 1     | 1             |
| BoSPL15b      |      |          | 1           | 1                 |                 |                 | 1                  | 1       | 1                  | 2                     | 2     |       | 1             |
| BoSPL16a      | 1    | 4        |             | 1                 |                 | 1               | 2                  | 1       | 3                  | 2                     |       |       |               |
| BoSPL16b      | 4    | 2        |             | 1                 | 2               | 2               | 2                  |         | 1                  |                       |       | 1     | 1             |
| BoSPL17       |      | 2        | 2           |                   | 1               | 2               |                    |         | 1                  | 2                     | 1     |       | 1             |
| BoSPL18       | 2    |          |             | 1                 | 1               | 3               |                    | 1       |                    |                       | 1     |       | 3             |
| BoSPL19       |      | 2        |             |                   |                 |                 | 2                  |         | 1                  |                       | 2     |       |               |
| BoSPL20       | 2    | 1        | 1           | 1                 |                 | 3               | 1                  |         | 3                  | 1                     | 3     |       |               |
