# Supplementary material for: Identification and Characterization of SPL Transcription Factor Family Reveals Organization and Chilling-Responsive Patterns in Cabbage (Brassica oleracea var. capitata L.)
Source: MDPI journal article supplement (doi:10.3390/agronomy11071445), 2021-07-20
Supplement: s1 [file s1]

Table S5. Different motifs commonly observed in BoSPL proteins.

| Motif | Length (aa) | Protein sequences                                  | Pfam domain |
|-------|-------------|----------------------------------------------------|-------------|
| 1     | 50          | SQIPRCQVDGCEADLSSAKDYHRRHKVCEVHSAKPKVTVSGLEQRFCQQC | SBP         |
| 2     | 29          | SRFHALSEFDEGKRSCRRRLAGHNERRRK                      | SBP         |
| 3     | 50          | RTGKIVFKLLGKDPSZLPGTLRTZIYSWLSSIPSEMESYIRPGCVILSVY |             |
| 4     | 48          | GSRRLFPTPIIHSMLAVATVCVCVCFMHAFPIVRQGSHFSWGGLDYG    |             |
| 5     | 50          | ITPLHLAASTSGSDDMIDVLTNDPQEIGLSSWNTLIDATGQTPFSYAAMR |             |
| 6     | 50          | WRTLESPELITVSPVAVVAGEETTLVVGRSLTNDGISFRCSHMGNYLSH  |             |
| 7     | 15          | DLGLKL GKRTYFEDG                                   |             |
| 8     | 28          | VLSESQSDCALSLLSNSSSPLPQPQNP                        |             |
| 9     | 16          | PERVYDGRQHTNMLWN                                   |             |
| 10    | 18          | WEVENGEIESFFPSIAG                                  |             |
| 11    | 40          | QSTSTNSSSPIVKQTKLASESSPGDSCSNIDFVQVKASTA           |             |
| 12    | 15          | NDWSSPLWDWDSLLF                                    |             |
| 13    | 29          | TTYDTKPTQMESGFTLSFQRGHGSEEQQV                      |             |
| 14    | 46          | IAMPEIMWAKLSKDPVAYLDEFILKPGKMLFGRGSMTVYLNMMIFR     |             |
| 15    | 28          | FSLPRFKFLLVCSVERDYSALIRTLLDM                       |             |
